# Supplementary material for: Effect of harvest on the agronomic, mineral and antioxidant profile of three oregano species (Origanum onites L., Origanum vulgare L. ssp. hirtum, and Origanum acutidens (Hand.-Mazz.) Ietswaart)
Source: PeerJ. 2025 Oct 21;13:e20223. doi: 10.7717/peerj.20223 (PMC12551659; doi:10.7717/peerj.20223)
Supplement: Supplemental Information 1 [file peerj-13-20223-s001.xlsx]

## Sheet: Page1
Species and Harvest Time	PH	CD	FHY	DHY	DPPH	ABTS	FRAP	TPC	TFC	Ca	K	P	Mg	Fe	Zn	B	Mn	Cu	Na	Al	Co	Cd	Cr	Ni	Pb	Mo	As
1	40.11	43.11	186.67	38.77	149.81	0.615	700.93	119.56	383.17	10084.7	12092.9	934.83	3140.75	144.49	13.49	12.42	39.66	9.49	35.62	400.25	0.18	0	1.19	1.53	0.18	0.34	0.13
2	33.78	59.44	226.38	76.72	101.85	0.67	890.63	158.63	640.39	13596.6	9059.09	718.43	3515.18	71.57	13.99	10.42	33.58	8.06	9.77	170.14	0.1	0	0.58	1.1	0	1.2	0.08
3	25.89	60.67	286.71	95.57	115.81	0.597	827.4	146.1	643.72	12751.6	8724.43	794.99	3318.77	43.21	15.11	17.23	25.45	9.32	39.01	75.6	0.07	0	0.42	1.62	0	0.31	0.06
4	48.22	48.11	199.11	62.55	142.72	0.997	1445.49	158.63	442.33	16260.3	11334.9	768.88	3598.42	229.12	17.1	40.3	47.82	8.55	18.7	639.62	0.28	0.01	2.23	1.72	0.37	0.94	0.16
5	65.11	75.33	281.86	116.94	152.95	0.909	1219.27	191.63	397.33	14207.6	7372.23	793.52	3560.11	84.85	18.56	30.7	32.16	7.62	30.93	189.12	0.12	0.01	0.7	1.41	0.12	0.64	0.1
6	79.56	75	292.25	153.34	145.88	0.971	1319.91	175.83	444.28	15818.1	7805.11	787.41	4359.86	125.78	21.54	35.24	32.54	9.38	24.29	314.59	0.17	0.01	1.3	2.21	0.25	0.7	0.12
7	46.33	50	142.89	55.48	163.18	0.964	1497.15	166.11	373.17	13837.8	8721.72	701.07	3470.67	287.1	12.88	33.26	47.48	8.23	27.78	826.11	0.37	0.01	3.05	2.49	0.7	0.94	0.16
8	44.56	41.39	115.7	38.57	167.02	0.849	1053.62	168.42	372.58	12769.9	6397.23	608.74	3093.34	502.46	13.47	27.15	52.96	9.03	100.18	1546.02	0.67	0	5.97	4.3	1.55	1.24	0.31
9	60	51.89	185.86	77.81	143.8	0.704	870.15	159.94	377.61	12563.2	7096.11	670.88	3690.46	1105.86	14.77	30.62	85.67	10.77	94.98	3541.48	1.43	0.01	12.37	7.33	3.68	1.08	0.49
